# Supplementary material for: A Cross Sectional Study on Serological Prevalence of Ehrlichia canis and Rickettsia conorii in Different Canine Population of Sicily (South-Italy) during 2017–2019
Source: PubMed Central journal article supplement (PMC7767218; doi:10.3390/ani10122444), 2020-12-20
Supplement: animals-10-02444-s001.pdf [file animals-10-02444-s001.pdf]

**Table S1: Temporal difference in *E. canis* infection.**

| Year          | Results             |                       | Row Totals         |
|---------------|---------------------|-----------------------|--------------------|
|               | Positive            | Negative              |                    |
| 2017          | 678 (697.60) [0.55] | 1681 (1661.40) [0.23] | 2359               |
| 2018          | 775 (754.97) [0.53] | 1778 (1798.03) [0.22] | 2553               |
| 2019          | 785 (785.43) [0.00] | 1871 (1870.57) [0.00] | 2656               |
| Column Totals | 2238                | 5330                  | 7568 (Grand Total) |

The chi-square statistic is 1.5368. The  $p$ -value is 0.463746. The result is not significant at  $p < 0.05$ . Bonferroni correction: Result is not significant at  $p < 0.016$

**Table S2: Spatial differences in *E. canis* infection.**

| Groups        | Results              |                        | Row Totals         |
|---------------|----------------------|------------------------|--------------------|
|               | Positive             | Negative               |                    |
| NS            | 787 (894.03) [23.85] | 2,313 (2166.97) [9.84] | 3,061              |
| SWS           | 747 (654.24) [13.15] | 1,493 (1585.76) [5.43] | 2,240              |
| SES           | 704 (650.73) [4.36]  | 1,524 (1577.27) [1.80] | 2,228              |
| Column Totals | 2,199                | 5,330                  | 7529 (Grand Total) |

The chi-square statistic is 58.4301. The  $p$ -value is  $< 0.00001$ . The result is significant at  $p < 0.05$ . Bonferroni correction: Result is significant at  $p < 0.016$

**Table S3: Difference between *E. canis* infection in the several groups analysed.****a. S vs O in NS**

| Groups        | Results             |                        | Row Totals          |
|---------------|---------------------|------------------------|---------------------|
|               | Positive            | Negative               |                     |
| NS/S          | 601 (589.87) [0.21] | 1,712 (1723.13) [0.07] | 2,313               |
| NS/O          | 186 (197.13) [0.63] | 587 (575.87) [0.22]    | 773                 |
| Column Totals | 787                 | 2,299                  | 3,086 (Grand Total) |

The chi-square statistic is 1.1259. The  $p$ -value is 0.288648. The result is not significant at  $p < 0.05$ .

**b. S vs O in SWS**

| Groups        | Results             |                        | Row Totals          |
|---------------|---------------------|------------------------|---------------------|
|               | Positive            | Negative               |                     |
| SWS/S         | 626 (622.28) [0.02] | 1,240 (1243.72) [0.01] | 1,866               |
| SWS/O         | 121 (124.72) [0.11] | 253 (249.28) [0.06]    | 374                 |
| Column Totals | 747                 | 1,493                  | 2,240 (Grand Total) |

The chi-square statistic is 0.2001. The  $p$ -value is 0.654655. The result is not significant at  $p < 0.05$ .

**c. S vs O in SES**

| Groups        | Results             |                        | Row Totals          |
|---------------|---------------------|------------------------|---------------------|
|               | Positive            | Negative               |                     |
| SES/S         | 671 (652.18) [0.54] | 1,393 (1411.82) [0.25] | 2,064               |
| SES/O         | 33 (51.82) [6.84]   | 131 (112.18) [3.16]    | 164                 |
| Column Totals | 704                 | 1,524                  | 2,228 (Grand Total) |

The chi-square statistic is 10.7869. The  $p$ -value is 0.001022. The result is significant at  $p < 0.05$ .

**Table S4: temporal difference in *R. conorii* infection.**

| Year          | Results              |                      | Row Totals          |
|---------------|----------------------|----------------------|---------------------|
|               | Positive             | Negative             |                     |
| 2017          | 481 (467.04) [0.42]  | 391 (404.95) [0.48]  | 872                 |
| 2018          | 795 (702.71) [12.12] | 517 (609.29) [13.98] | 1,312               |
| 2019          | 567 (673.25) [16.77] | 690 (583.75) [19.34] | 1,257               |
| Column Totals | 1,843                | 1598                 | 3,441 (Grand Total) |

The chi-square statistic is 63.1061. The  $p$ -value is 0.00001. The result is significant at  $p < 0.05$ . Bonferroni correction: Result is significant at  $p < 0.016$

**Table S5: Spatial differences in *R. conorii* infection.**

| Groups        | Results               |                       | Row Totals         |
|---------------|-----------------------|-----------------------|--------------------|
|               | Positive              | Negative              |                    |
| NS            | 1274 (1287.26) [1.26] | 1173 (1132.72) [1.43] | 2420               |
| SWS           | 440 (365.43) [15.21]  | 247 (311.28) [17.29]  | 687                |
| SES           | 129 (163.30) [7.21]   | 178 (143.70) [8.19]   | 307                |
| Column Totals | 1,816                 | 1,598                 | 3134 (Grand Total) |

The chi-square statistic is 50.5894. The  $p$ -value is  $< 0.00001$ . The result is significant at  $p < 0.05$ . Bonferroni correction: Result is significant at  $p < 0.016$

**Table S6: Difference between *R. conorii* infection in the several groups analysed.****a. S vs PO in NS**

| Groups        | Results             |                     | Row Totals          |
|---------------|---------------------|---------------------|---------------------|
|               | Positive            | Negative            |                     |
| NS/S          | 924 (962.66) [1.55] | 925 (886.34) [1.69] | 1,849               |
| NS/O          | 350 (311.34) [4.80] | 248 (286.66) [5.21] | 598                 |
| Column Totals | 1,274               | 1173                | 2,447 (Grand Total) |

The chi-square statistic is 13.2523. The  $p$ -value is 0.000272. The result is significant at  $p < 0.05$ .

**b. S vs PO in SWS**

| Groups        | Results             |                     | Row Totals        |
|---------------|---------------------|---------------------|-------------------|
|               | Positive            | Negative            |                   |
| SWS/S         | 228 (243.38) [0.97] | 152 (136.62) [1.73] | 380               |
| SWS/O         | 212 (196.62) [1.20] | 95 (110.38) [2.14]  | 307               |
| Column Totals | 440                 | 247                 | 687 (Grand Total) |

The chi-square statistic is 6.047. The  $p$ -value is 0.01393. The result is significant at  $p < 0.05$ .

**c. S vs PO in SES**

| Groups        | Results             |                     | Row Totals        |
|---------------|---------------------|---------------------|-------------------|
|               | Positive            | Negative            |                   |
| SES/S         | 111 (103.37) [0.56] | 135 (142.63) [0.41] | 246               |
| SES/O         | 18 (25.63) [2.27]   | 43 (35.37) [1.65]   | 61                |
| Column Totals | 129                 | 178                 | 307 (Grand Total) |

The chi-square statistic is 4.8911. The  $p$ -value is 0.026995. The result is significant at  $p < 0.05$ .
